# Supplementary material for: Chemoselective signalling of selected phospho-anions using lanthanide luminescence
Source: Royal Society of Chemistry journal article supplement (doi:10.1039/b313496m), 2004-01-01

ESI includes:

Figures 1 and 2:

Binding isotherms for titration of [Eu.2] with Tyr-OP and Ser-OP in the presence of 5mM sodium bicarbonate (pH 7.4, 0.1M MOPS)

Figure 3;

Job plot for addition of [Eu.1] to AMP (pH 5.4, 0.1 M MOPS); a similar plot with an inflection at 0.5 was obtained at pH 7.4

Table 1;

Summary of partial paramagnetic NMR data highlighting the mean shift data for the axial ring protons in Tm and Yb complexes of 4a/4b with various anions.

Figure 4

Correlation of Yb and Tm NMR shift data for complexes of [Ln.4a] showing the linear correlation consistent with presence of a purely pseudo-contact contribution for the mean chemical shift of the axial ring proton

Figures and 6

Partial 1-H NMR spectra (500MHz, 295K, 4mM complex 4-fold excess of added anion) for [Yb/Tm.4a], highlighting the sensitivity of the NMR spectral profile to the nature of the adduct.

Binding isotherm for titration of [Eu.2] with Tyr-OP  
in the presence of 5 mM  $\text{HCO}_3^-$  (pH=7.4, 0.1 M MOPS)

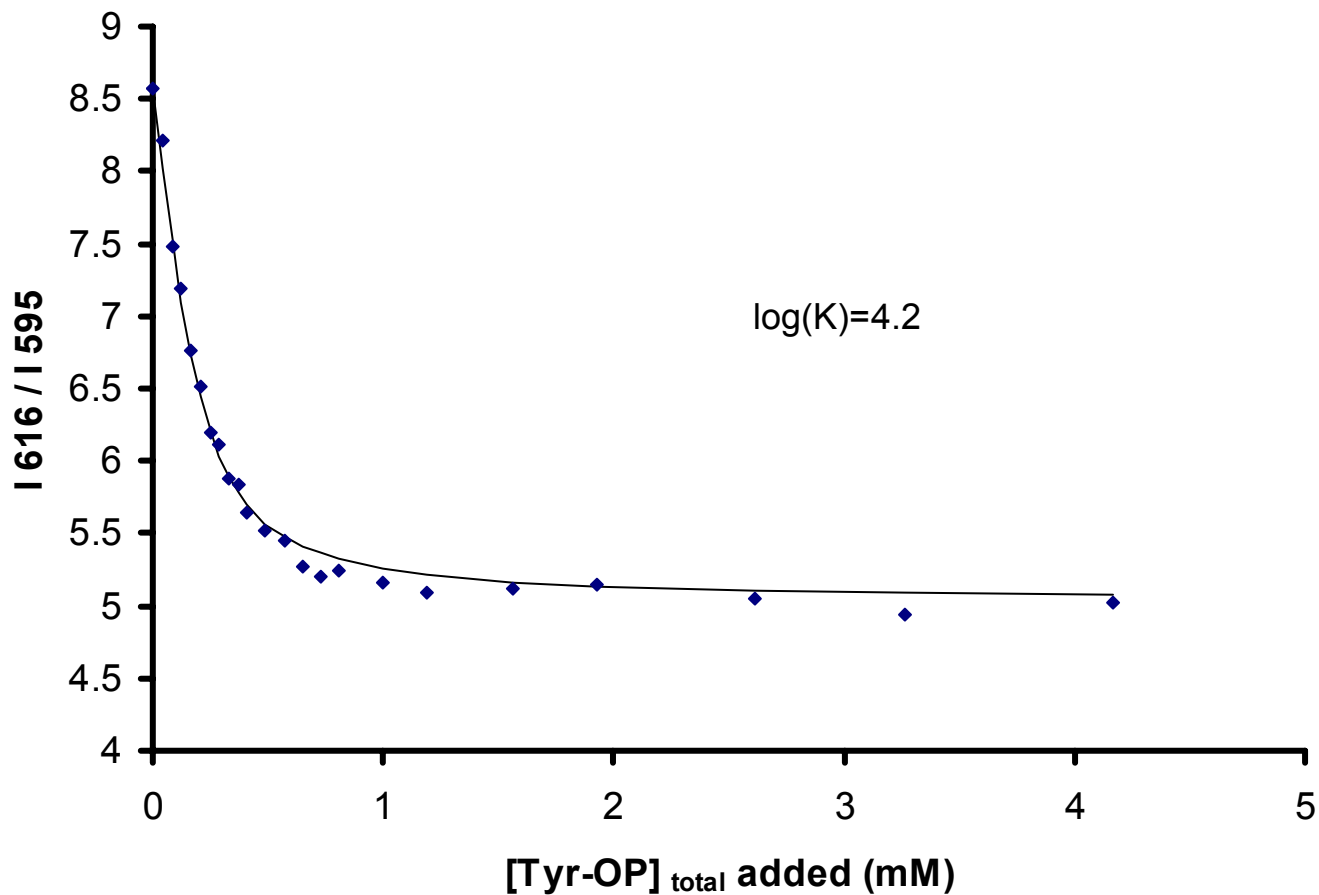

Binding isotherm for titration of [Eu.2] with Ser-OP  
in the presence of 5 mM  $\text{HCO}_3^-$  (pH=7.4, 0.1 M MOPS)

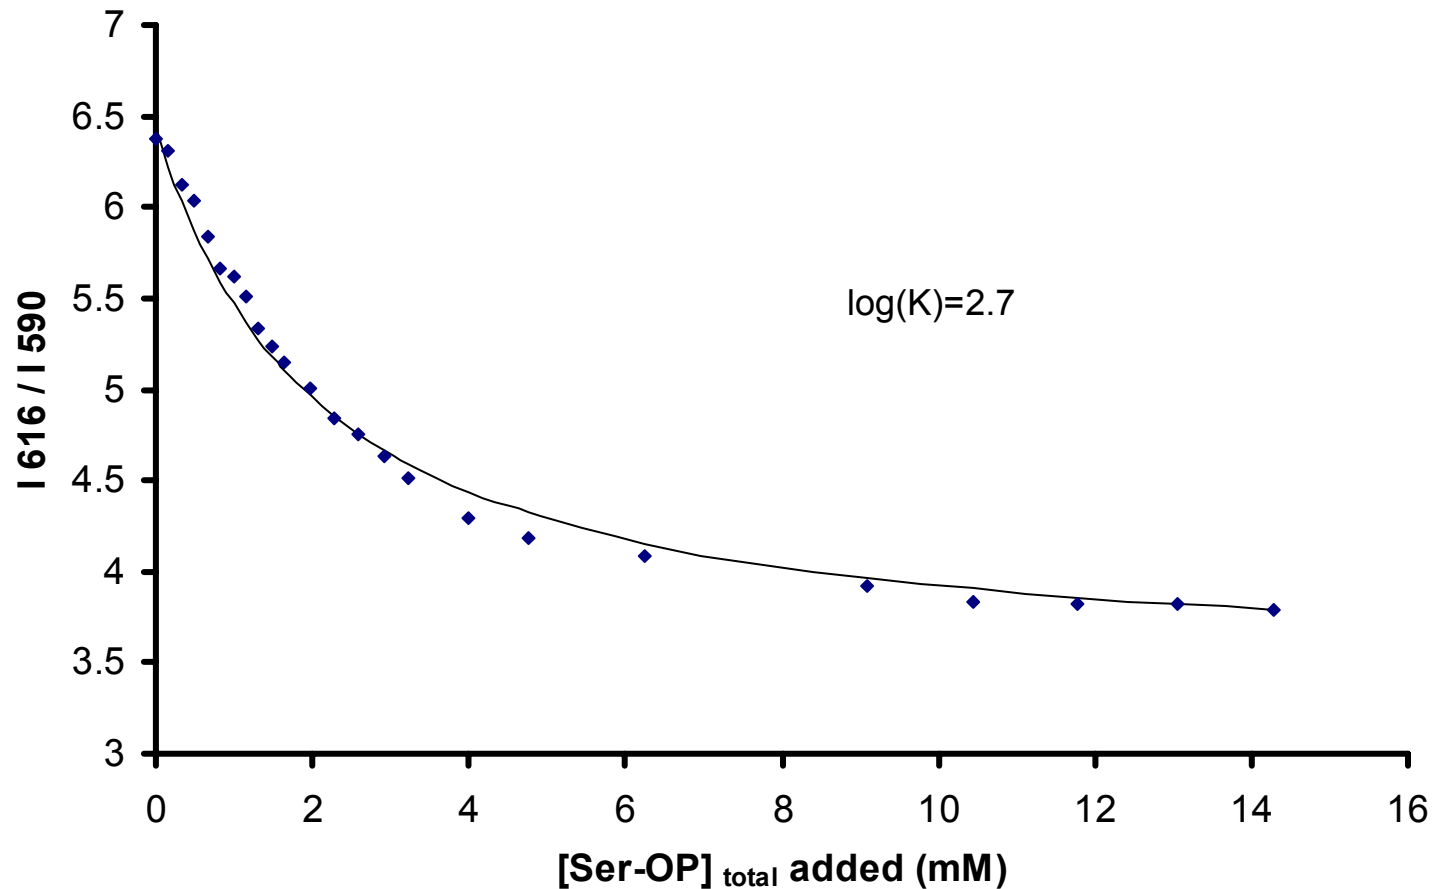

**[Eu.1] + AMP**  
**pH=5.4, 0.1 M MOPS**

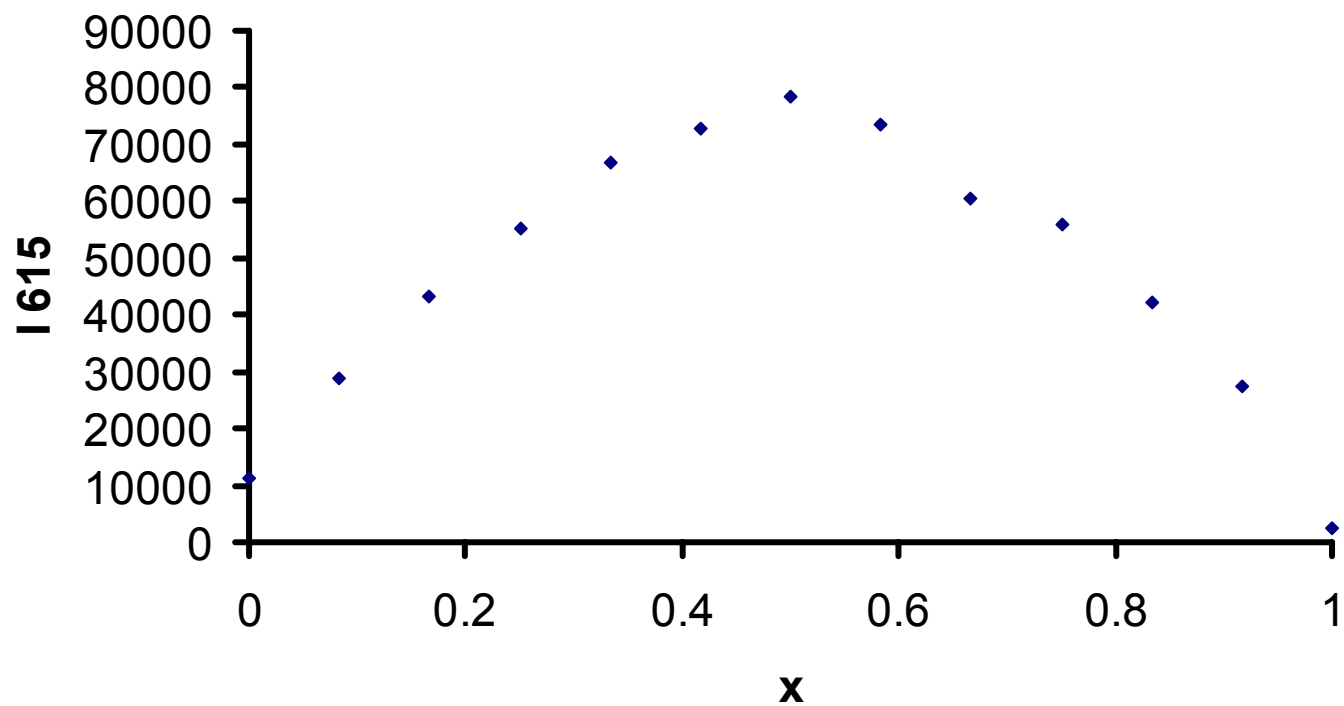

| Anion                   | Average dipolar shift of axial ring protons / $\delta$ |          |         |           |
|-------------------------|--------------------------------------------------------|----------|---------|-----------|
|                         | [Yb.4a]                                                | [Yb.4b]  | [Tm.4a] | [Tm.4b]   |
| None (H <sub>2</sub> O) | 75                                                     | 101      | 210     | 313       |
| Hydrogen carbonate      | 27                                                     | 32       | 78      | 94        |
| L-Serine                | 44                                                     | 55       | 130     | 165       |
| L-Threonine             | 44                                                     | 58       | 137     | 171       |
| L-Tyrosine              | 39                                                     | 51       | 122     | 152       |
| D-Lactate               | 71                                                     | 89       | 212     | 265       |
| Acetate                 | 69                                                     | 76       | 207     | 231       |
| Hydrogen phosphate      | 100                                                    | 100      | 247     | 349       |
| Phospho-L-Serine        | 91                                                     | 54 (107) | 265     | 161 (360) |
| Phospho-L-Threonine     | 92                                                     | 57 (109) | 268     | 171 (365) |
| Phospho-L-Tyrosine      | 95                                                     | 53       | 281     | 158 (373) |
| Glucose-6-Phosphate     | 87                                                     | 105      | 254     | 356       |
| AMP                     | 88                                                     | 108      | 258     | 362       |
| F <sup>-</sup>          | 99                                                     | 114      | 299     | 430       |

Data above relate to the mean dipolar shift of the most paramagnetically shifted ring proton resonance (pseudo-contact shift dominant), i.e. the axial proton nearest the Ln centre within the McConnell cone. Values in parentheses for phosphorylated amino-acids refer to the O-phosphate bound species, compared to the amino-acid chelate to lower frequency. Data were measured at 500MHz and 295K in D<sub>2</sub>O with 4mM solutions of complex and a 5-fold excess of added anion. Independent titration had revealed that under these conditions the ternary adducts were not only in slow exchange with the aqua precursor (triflate anion) on the NMR timescale, but were fully bound and the shifts given are therefore limiting shifts for the ternary complex. In the case of glucose-6-phosphate, the resolved resonances (see figure 5 ESI) may relate to the glucofuranose and glucopyranose adducts.

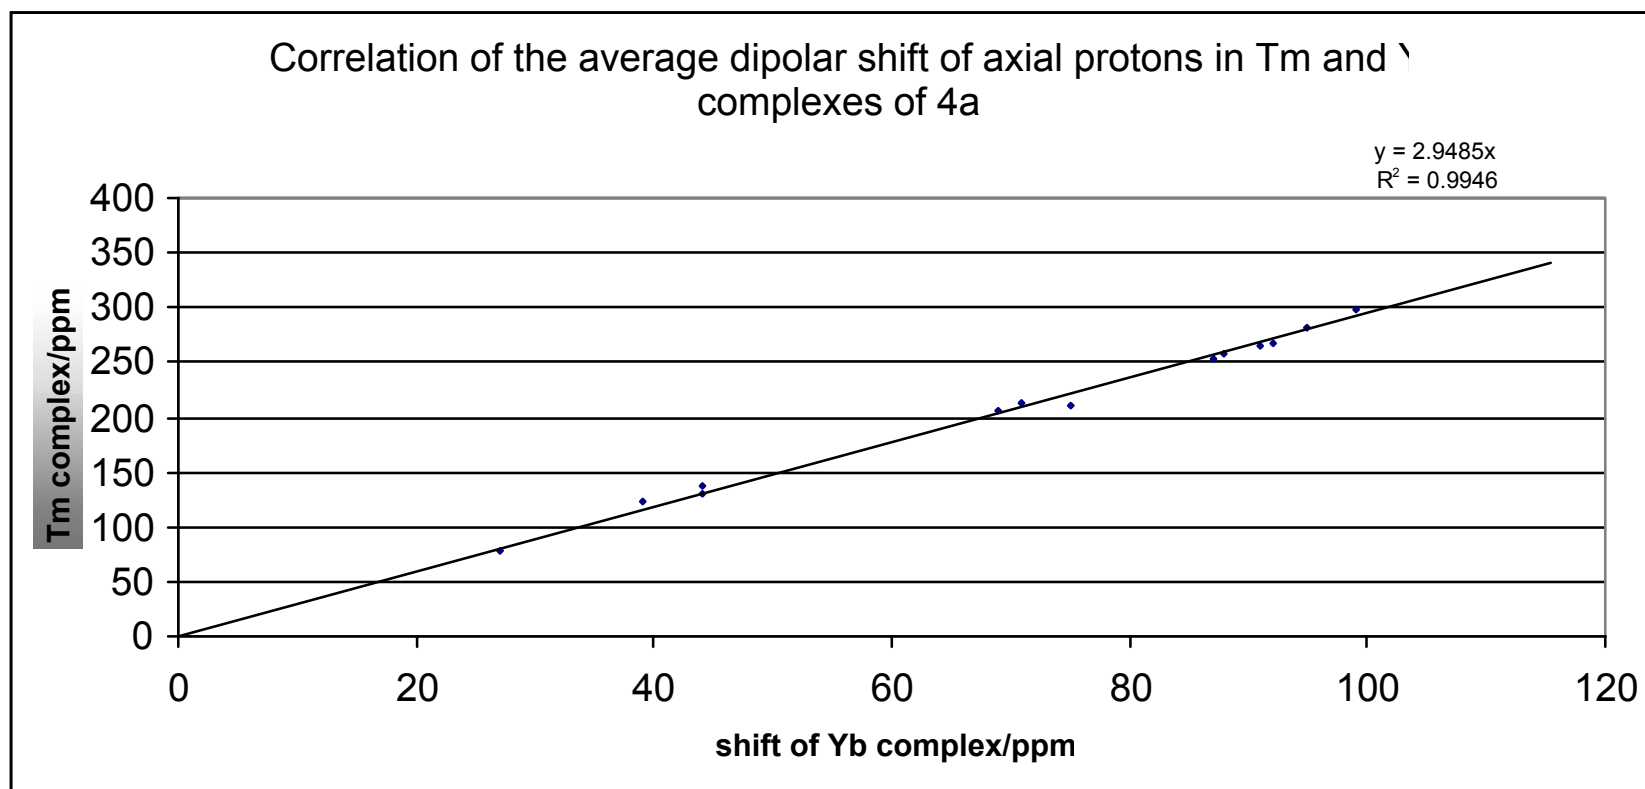

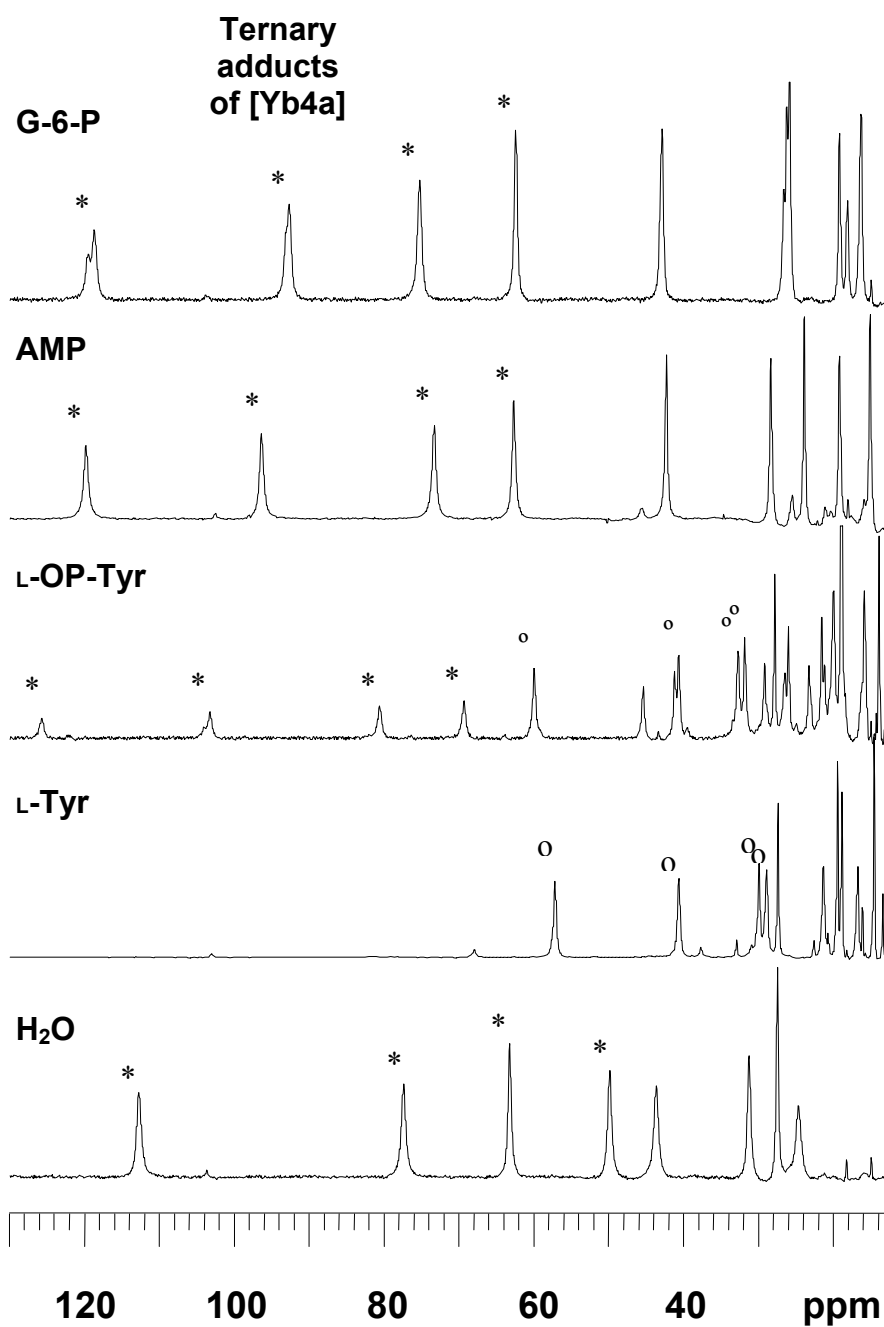

Starred resonances show the most shifted axial ring protons in each of the 4 5-membered NCCN chelate rings of the 12-N-4 ring. For Tyr-OP and Tyr, the circled resonances show the amino-acid chelate

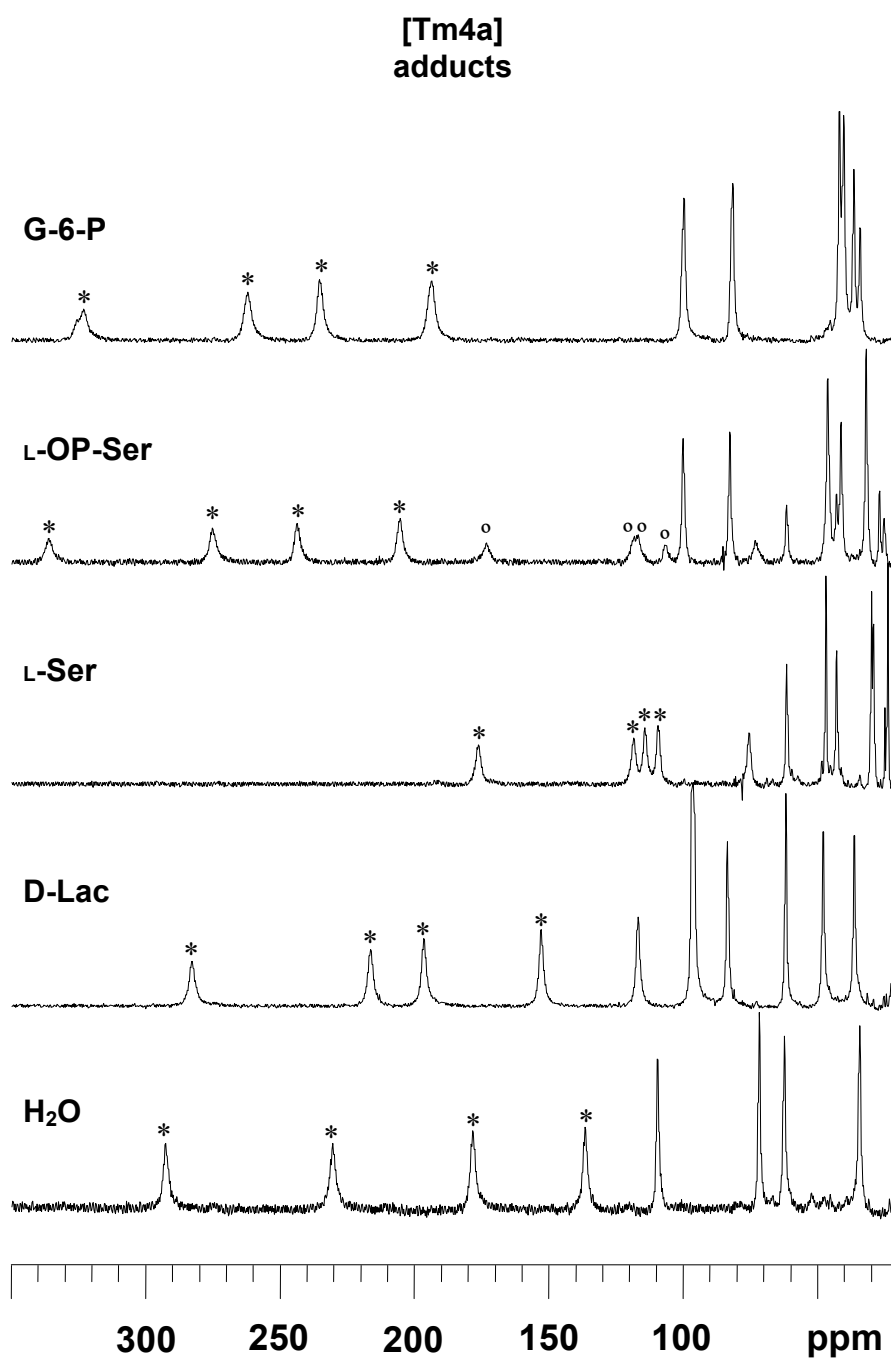

Supplement: b313496m.pdf [file b313496m.pdf]
